# Supplementary material
Source: PubMed Central journal article supplement (PMC3104740)

**Supplemental Figure S1. Generation of the Phox2b Cre transgenic line.** Cre recombinase was recombined into the Phox2b locus of a BAC (A, Phox2b exons in red). Independent founder lines were generated and crossed to a R26R lacZ reporter strain for the characterization of Cre expression pattern (B-D). All lines exhibited expression in the hindbrain with variable expression in the NTS. Line 3 (D) exhibited the greatest level of NTS expression and was used to delete leptin receptor expression from the hindbrain

**Supplemental Figure S2. Characterization of PhoxCre Lacz expression.** Cre activated lacz expression was observed throughout the dorsal vagal complex and the related nucleus ambiguus (A). Further rostrally, expression was observed in the facial (n7, B) and trigeminal nerves (not shown) along with locus coeruleus (not shown). Expression in ocular (n3, C) and trochlear (n4, D) was also seen, in agreement with the expression pattern of Phox2b. In the periphery, vagal sensory neurons (nodose, E) expressed recombinase. Importantly, expression in the hypothalamus (F) was also absent. Expression in the visceral motor nerves was confirmed by double immunofluorescence for the cholinergic marker ChAT (green) and lacz (red) with overlap shown in yellow. All visceral motor neurons expressed lacz, as vagal (G) and facial motor neurons (H) showed complete co-expression. NTS neurons (G) are labeled red and are dorsal of the vagus (arrows). As expected from the description of Phox2b expression, Cre expression is absent in the hypoglossal nerve, ventral of the vagus (G, green). Phox2b insitu (black deposit) is observed throughout the NTS and co-localizes with PhoxCre activated lacZ. Scale bar = (A-D, 250µm), (E,H, 100µm), (F,G,I,50µm (insert = 25 µm)

**Supplemental Figure S3. Control Cumulative Weight Change.** WT and Phox2b Cre (PC Cre) mice body weights were followed on chow diet for 30 weeks. No change in body weight was observed between the control WT group and PC Cre group (N=15)

Supplemental Figure 1

### Phox2b Locus in RP24-95M11 BAC

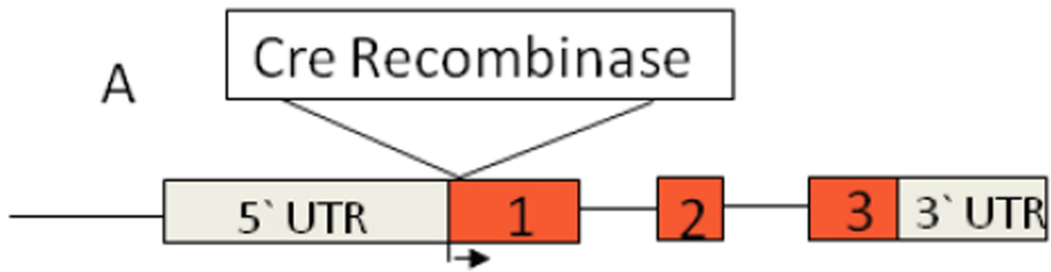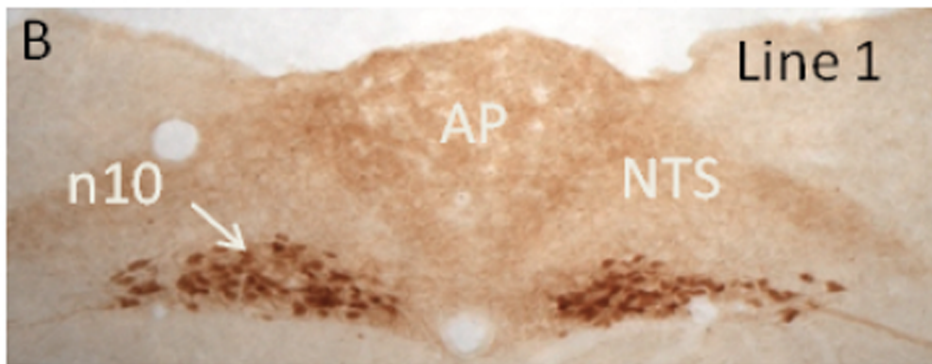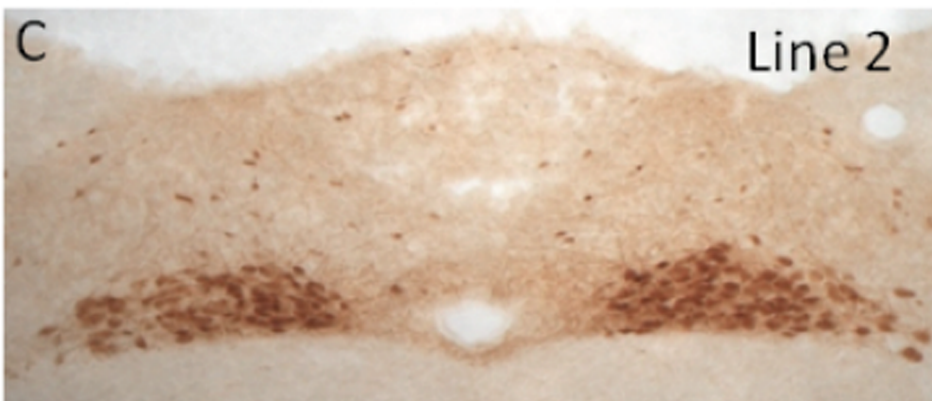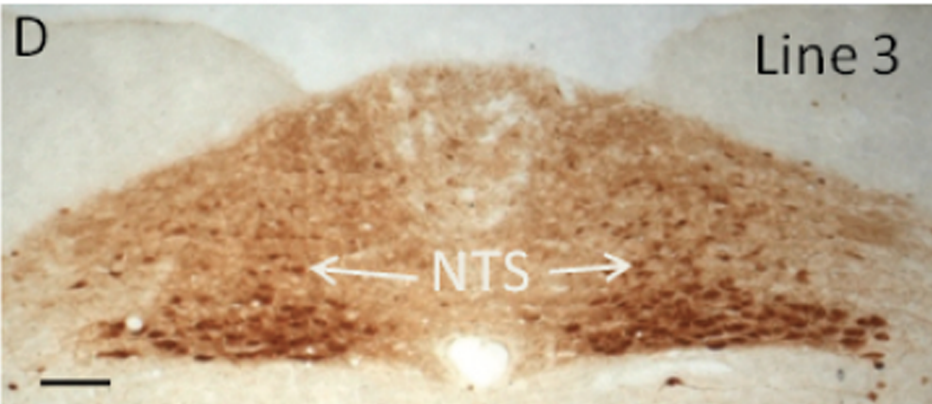

**Supplemental Figure 2**

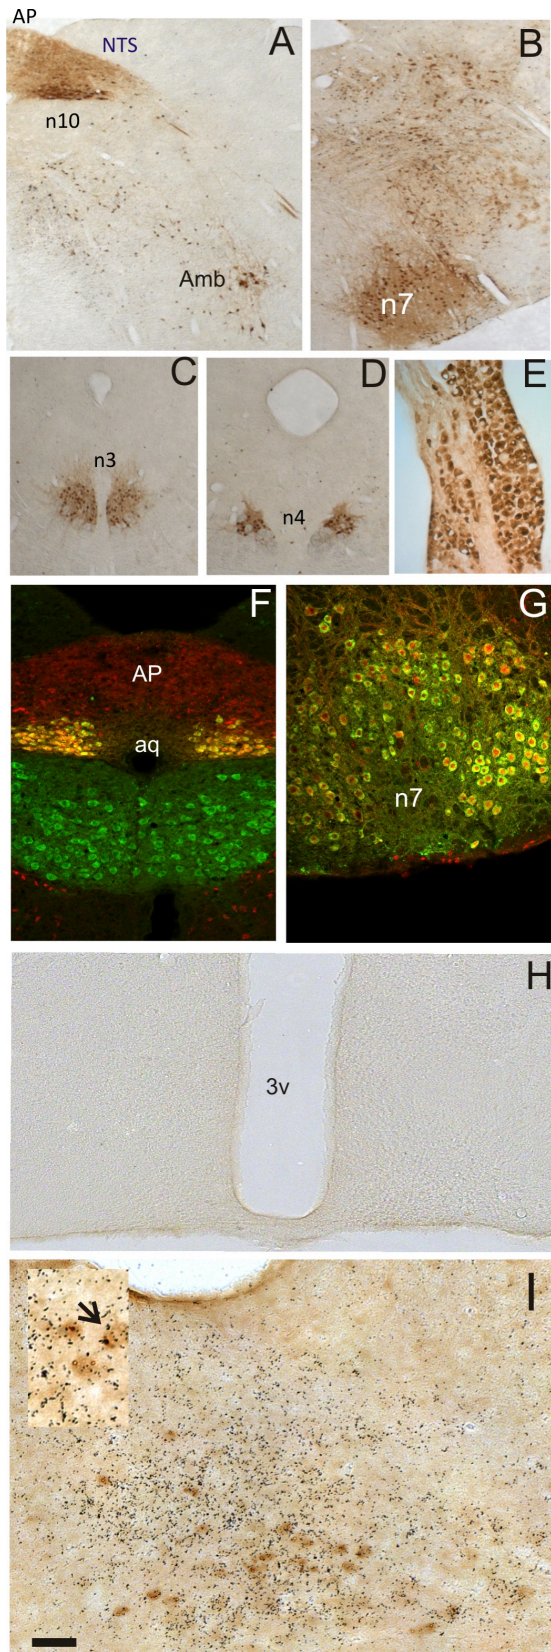

Supplemental Figure 3

### Control Body Weight

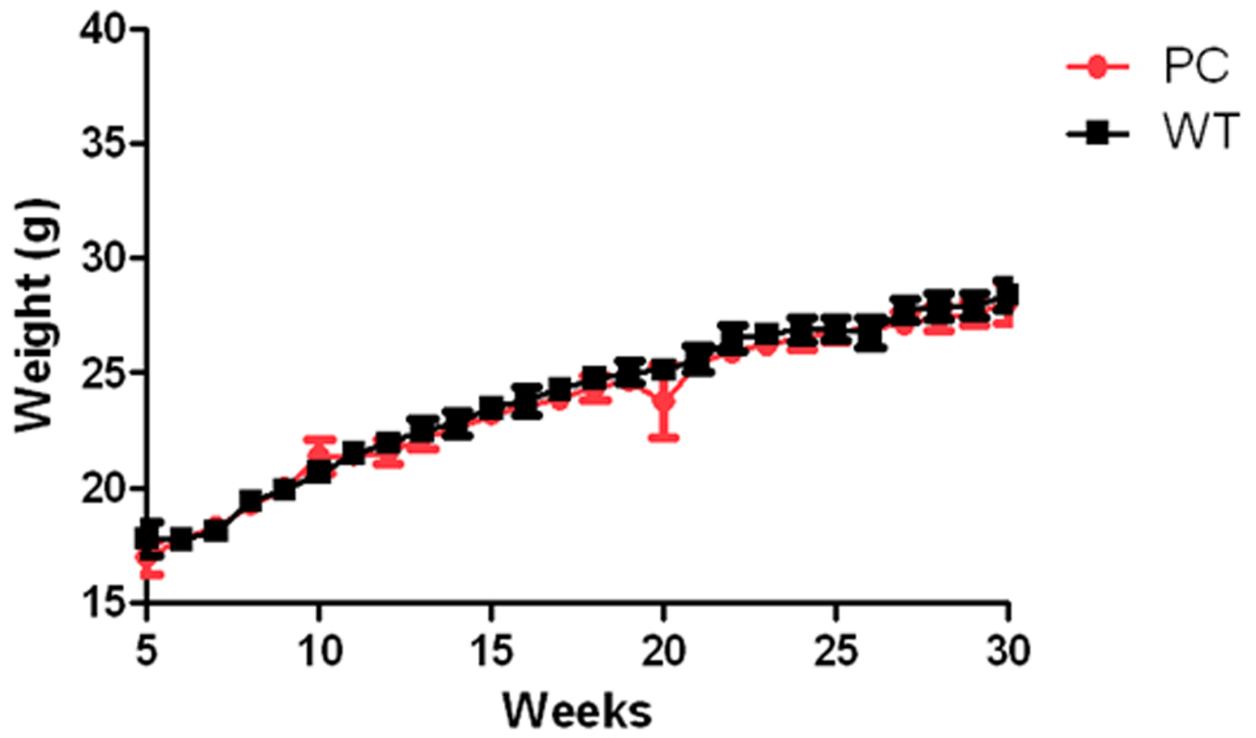

Supplement: JCI43703sd.pdf [file JCI43703sd.pdf]
